# Supplementary material for: Epidemic Varicella Zoster Virus among University Students, India
Source: PubMed Central journal article supplement (PMC5782884; doi:10.3201/eid2402.170659), 2018-02
Supplement: 17-0659-Techapp-s1.pdf [file 17-0659-Techapp-s1.pdf]

# Epidemic Varicella Zoster Virus among University Students, India

## Technical Appendix

**Technical Appendix Table.** Attack rate of varicella among college students by dormitory and total number of cases recorded at the University Hospital over 12 months\*

| Dormitory                 | Cases | Occupied beds | Rate per 1,000 university dormitory residents |
|---------------------------|-------|---------------|-----------------------------------------------|
| Block 1 (male and female) | 3     | 813           | 4                                             |
| Block 2 (male only)       | 7     | 966           | 7                                             |
| Block 3 (male only)       | 13    | 938           | 14                                            |
| Block 4 (male only)       | 17    | 963           | 18                                            |
| Block 5 (male only)       | 23    | 976           | 23                                            |
| Block 6 (male only)       | 2     | 544           | 4                                             |
| Block 7 (female only)     | 1     | 549           | 2                                             |
| Block 8 (female only)     | 3     | 539           | 5.5                                           |
| Block 9 (female only)     | 4     | 683           | 6                                             |
| Total                     | 100   | 6,971         | 14                                            |

\*Includes all recorded cases from university campus hostels, including those who did not complete the study questionnaire.
